# Supplementary material for: Evaluation of the discriminatory power of spoligotyping and 19-locus mycobacterial interspersed repetitive unit-variable number of tandem repeat analysis (MIRU-VNTR) of Mycobacterium bovis strains isolated from cattle in Algeria
Source: PubMed Central journal article supplement (PMC8751994; doi:10.1371/journal.pone.0262390), 2022-01-11
Supplement: pone.0262390.s002.pdf [file pone.0262390.s002.pdf]

# PLOS ONE

## Evaluation of the discriminatory power of spoligotyping and 19-locus mycobacterial interspersed repetitive unit-variable number of tandem repeat analysis (MIRU-VNTR) of *Mycobacterium bovis* strains isolated from cattle in Algeria

--Manuscript Draft--

|                                                                                                                                                                                                                                                               |                                                                                                                                                                                                                                                                                                                                                                                                                                                                                                                                                                                                                                                                                                                                                                                                                                                                                                                                                                                                                                                                                                                                                                                                                                                                                                                                                                                                                                                                                                                                                                                                                                |
|---------------------------------------------------------------------------------------------------------------------------------------------------------------------------------------------------------------------------------------------------------------|--------------------------------------------------------------------------------------------------------------------------------------------------------------------------------------------------------------------------------------------------------------------------------------------------------------------------------------------------------------------------------------------------------------------------------------------------------------------------------------------------------------------------------------------------------------------------------------------------------------------------------------------------------------------------------------------------------------------------------------------------------------------------------------------------------------------------------------------------------------------------------------------------------------------------------------------------------------------------------------------------------------------------------------------------------------------------------------------------------------------------------------------------------------------------------------------------------------------------------------------------------------------------------------------------------------------------------------------------------------------------------------------------------------------------------------------------------------------------------------------------------------------------------------------------------------------------------------------------------------------------------|
| <b>Manuscript Number:</b>                                                                                                                                                                                                                                     | PONE-D-21-26506                                                                                                                                                                                                                                                                                                                                                                                                                                                                                                                                                                                                                                                                                                                                                                                                                                                                                                                                                                                                                                                                                                                                                                                                                                                                                                                                                                                                                                                                                                                                                                                                                |
| <b>Article Type:</b>                                                                                                                                                                                                                                          | Research Article                                                                                                                                                                                                                                                                                                                                                                                                                                                                                                                                                                                                                                                                                                                                                                                                                                                                                                                                                                                                                                                                                                                                                                                                                                                                                                                                                                                                                                                                                                                                                                                                               |
| <b>Full Title:</b>                                                                                                                                                                                                                                            | Evaluation of the discriminatory power of spoligotyping and 19-locus mycobacterial interspersed repetitive unit-variable number of tandem repeat analysis (MIRU-VNTR) of <i>Mycobacterium bovis</i> strains isolated from cattle in Algeria                                                                                                                                                                                                                                                                                                                                                                                                                                                                                                                                                                                                                                                                                                                                                                                                                                                                                                                                                                                                                                                                                                                                                                                                                                                                                                                                                                                    |
| <b>Short Title:</b>                                                                                                                                                                                                                                           | <i>Mycobacterium bovis</i> from cattle in Algeria                                                                                                                                                                                                                                                                                                                                                                                                                                                                                                                                                                                                                                                                                                                                                                                                                                                                                                                                                                                                                                                                                                                                                                                                                                                                                                                                                                                                                                                                                                                                                                              |
| <b>Corresponding Author:</b>                                                                                                                                                                                                                                  | Stefanie Barth<br>Friedrich-Loeffler-Institut Bundesforschungsinstitut für Tiergesundheit<br>Jena, GERMANY                                                                                                                                                                                                                                                                                                                                                                                                                                                                                                                                                                                                                                                                                                                                                                                                                                                                                                                                                                                                                                                                                                                                                                                                                                                                                                                                                                                                                                                                                                                     |
| <b>Keywords:</b>                                                                                                                                                                                                                                              | <i>Mycobacterium bovis</i> ; <i>Mycobacterium caprae</i> ; molecular characterization; spoligotyping; MIRU-VNTR-typing; cattle; Algeria                                                                                                                                                                                                                                                                                                                                                                                                                                                                                                                                                                                                                                                                                                                                                                                                                                                                                                                                                                                                                                                                                                                                                                                                                                                                                                                                                                                                                                                                                        |
| <b>Abstract:</b>                                                                                                                                                                                                                                              | Bovine tuberculosis (bTB) caused by <i>Mycobacterium</i> ( <i>M.</i> ) <i>bovis</i> and <i>M. caprae</i> is a transmissible disease of livestock, notifiable to the World Organization for Animal Health (OIE). bTB particularly affects cattle and small ruminants and can be transmitted to humans thereby posing a significant threat to veterinary and public health worldwide. <i>M. bovis</i> is the principal cause of bTB in Algeria. In order to better understand the route of spreading and elaborate an eradication program, isolation and characterization of mycobacteria from Algerian cattle has been performed. Sixty strains belonging to the <i>M. tuberculosis</i> complex have been analyzed by spoligotyping, thereof 42 by 19-locus-MIRU-VNTR-typing. Spoligotyping revealed 16 distinguishable patterns (Hunter-Gaston discriminatory index [HGDI] of 0.8294), with types SB0120 (n = 20) and SB0121 (n = 13) being the most frequent patterns, representing 55% of the strains. Analyses based on 19-locus-MIRU-VNTR yielded 32 different profiles, five clusters and one orphan pattern, showing higher discriminatory power (HGDI = 0.9779) than spoligotyping. Seven VNTR-loci [VNTR 577 (alias ETR C), 2163b (QU11b), 2165 (ETR A), 2461 (ETR B), 3007 (MIRU 27), 2163a (QUB11a) and 3232 (QUB 3232)] were the most discriminative loci (HGDI > 0.50). In conclusion, 19-locus-MIRU-VNTR yielded more information than spoligotyping concerning molecular differentiation of strains and better supports the elucidation of transmission routes of <i>M. bovis</i> between Algerian cattle herds. |
| <b>Order of Authors:</b>                                                                                                                                                                                                                                      | Faïza Belakehal<br>Stefanie A. Barth<br>Christian Menge<br>Hamdi T. Mossadak<br>Naim Malek<br>Irmgard Moser                                                                                                                                                                                                                                                                                                                                                                                                                                                                                                                                                                                                                                                                                                                                                                                                                                                                                                                                                                                                                                                                                                                                                                                                                                                                                                                                                                                                                                                                                                                    |
| <b>Additional Information:</b>                                                                                                                                                                                                                                |                                                                                                                                                                                                                                                                                                                                                                                                                                                                                                                                                                                                                                                                                                                                                                                                                                                                                                                                                                                                                                                                                                                                                                                                                                                                                                                                                                                                                                                                                                                                                                                                                                |
| <b>Question</b>                                                                                                                                                                                                                                               | <b>Response</b>                                                                                                                                                                                                                                                                                                                                                                                                                                                                                                                                                                                                                                                                                                                                                                                                                                                                                                                                                                                                                                                                                                                                                                                                                                                                                                                                                                                                                                                                                                                                                                                                                |
| <b>Financial Disclosure</b><br><br>Enter a financial disclosure statement that describes the sources of funding for the work included in this submission. Review the <a href="#">submission guidelines</a> for detailed requirements. View published research | Parts of this work were funded by a travel and stay grant from the High National Veterinary School, Algeria, (ENSV, <a href="http://www.ensv.dz">www.ensv.dz</a> ) (grant no. 000592) for Faïza Belakehal. The funders had no role in study design, data collection and analysis, decision to publish, or preparation of the manuscript.                                                                                                                                                                                                                                                                                                                                                                                                                                                                                                                                                                                                                                                                                                                                                                                                                                                                                                                                                                                                                                                                                                                                                                                                                                                                                       |

articles from [PLOS ONE](#) for specific examples.

This statement is required for submission and **will appear in the published article** if the submission is accepted. Please make sure it is accurate.

#### Unfunded studies

Enter: *The author(s) received no specific funding for this work.*

#### Funded studies

Enter a statement with the following details:

- Initials of the authors who received each award
- Grant numbers awarded to each author
- The full name of each funder
- URL of each funder website
- Did the sponsors or funders play any role in the study design, data collection and analysis, decision to publish, or preparation of the manuscript?
- **NO** - Include this sentence at the end of your statement: *The funders had no role in study design, data collection and analysis, decision to publish, or preparation of the manuscript.*
- **YES** - Specify the role(s) played.

\* typeset

#### Competing Interests

Use the instructions below to enter a competing interest statement for this submission. On behalf of all authors, disclose any [competing interests](#) that could be perceived to bias this work—acknowledging all financial support and any other relevant financial or non-financial competing interests.

This statement is **required** for submission and **will appear in the published article** if the submission is accepted. Please make sure it is accurate and that any funding sources listed in your Funding Information later in the submission form are also declared in your Financial Disclosure statement.

The authors have declared that no competing interests exist.

View published research articles from [PLOS ONE](#) for specific examples.

#### **NO authors have competing interests**

Enter: *The authors have declared that no competing interests exist.*

#### **Authors with competing interests**

Enter competing interest details beginning with this statement:

*I have read the journal's policy and the authors of this manuscript have the following competing interests: [insert competing interests here]*

\* typeset

#### **Ethics Statement**

Enter an ethics statement for this submission. This statement is required if the study involved:

- Human participants
- Human specimens or tissue
- Vertebrate animals or cephalopods
- Vertebrate embryos or tissues
- Field research

Write "N/A" if the submission does not require an ethics statement.

General guidance is provided below. Consult the [submission guidelines](#) for detailed instructions. **Make sure that all information entered here is included in the Methods section of the manuscript.**

All samples were obtained at selected slaughterhouses in Algeria during routine meat inspection procedure. No additional permission was needed.

**Format for specific study types**

**Human Subject Research (involving human participants and/or tissue)**

- Give the name of the institutional review board or ethics committee that approved the study
- Include the approval number and/or a statement indicating approval of this research
- Indicate the form of consent obtained (written/oral) or the reason that consent was not obtained (e.g. the data were analyzed anonymously)

**Animal Research (involving vertebrate animals, embryos or tissues)**

- Provide the name of the Institutional Animal Care and Use Committee (IACUC) or other relevant ethics board that reviewed the study protocol, and indicate whether they approved this research or granted a formal waiver of ethical approval
- Include an approval number if one was obtained
- If the study involved *non-human primates*, add *additional details* about animal welfare and steps taken to ameliorate suffering
- If anesthesia, euthanasia, or any kind of animal sacrifice is part of the study, include briefly which substances and/or methods were applied

**Field Research**

Include the following details if this study involves the collection of plant, animal, or other materials from a natural setting:

- Field permit number
- Name of the institution or relevant body that granted permission

**Data Availability**

Authors are required to make all data underlying the findings described fully available, without restriction, and from the time of publication. PLOS allows rare exceptions to address legal and ethical concerns. See the [PLOS Data Policy](#) and [FAQ](#) for detailed information.

Yes - all data are fully available without restriction

A Data Availability Statement describing where the data can be found is required at submission. Your answers to this question constitute the Data Availability Statement and **will be published in the article**, if accepted.

**Important:** Stating 'data available on request from the author' is not sufficient. If your data are only available upon request, select 'No' for the first question and explain your exceptional situation in the text box.

Do the authors confirm that all data underlying the findings described in their manuscript are fully available without restriction?

**Describe where the data may be found in full sentences. If you are copying our sample text, replace any instances of XXX with the appropriate details.**

- If the data are **held or will be held in a public repository**, include URLs, accession numbers or DOIs. If this information will only be available after acceptance, indicate this by ticking the box below. For example: *All XXX files are available from the XXX database (accession number(s) XXX, XXX).*
- If the data are all contained **within the manuscript and/or Supporting Information files**, enter the following: *All relevant data are within the manuscript and its Supporting Information files.*
- If neither of these applies but you are able to provide **details of access elsewhere**, with or without limitations, please do so. For example:

*Data cannot be shared publicly because of [XXX]. Data are available from the XXX Institutional Data Access / Ethics Committee (contact via XXX) for researchers who meet the criteria for access to confidential data.*

*The data underlying the results presented in the study are available from (include the name of the third party*

All relevant data are within the manuscript.

*and contact information or URL).*

- This text is appropriate if the data are owned by a third party and authors do not have permission to share the data.

\* typeset

Additional data availability information:



## 28 **Abstract**

29 Bovine tuberculosis (bTB) caused by *Mycobacterium (M.) bovis* and *M. caprae* is a  
30 transmissible disease of livestock, notifiable to the World Organization for Animal Health  
31 (OIE). BTB particularly affects cattle and small ruminants and can be transmitted to humans  
32 thereby posing a significant threat to veterinary and public health worldwide. *M. bovis* is the  
33 principal cause of bTB in Algeria. In order to better understand the route of spreading and  
34 elaborate an eradication program, isolation and characterization of mycobacteria from Algerian  
35 cattle **has been** performed. Sixty strains belonging to the *M. tuberculosis* complex **have been**  
36 analyzed by spoligotyping, thereof 42 by 19-locus-MIRU-VNTR-typing. Spoligotyping  
37 revealed 16 distinguishable patterns (Hunter-Gaston discriminatory index [HGDI] of 0.8294),  
38 with types SB0120 (n = 20) and SB0121 (n = 13) being the most frequent patterns, representing  
39 55% of the strains. Analyses based on 19-locus-MIRU-VNTR yielded 32 different profiles, five  
40 clusters and one orphan pattern, showing higher discriminatory power (HGDI = 0.9779) than  
41 spoligotyping. Seven VNTR-loci [VNTR 577 (alias ETR C), 2163b (QU11b), 2165 (ETR A),  
42 2461 (ETR B), 3007 (MIRU 27), 2163a (QUB11a) and 3232 (QUB 3232)] were the most  
43 discriminative loci (HGDI > 0.50). In conclusion, 19-locus-MIRU-VNTR yielded more  
44 information than spoligotyping concerning molecular differentiation of strains and better  
45 supports the elucidation of transmission routes of *M. bovis* between Algerian cattle herds.

46 **Keywords:** Algeria, *Mycobacterium bovis*, *Mycobacterium caprae*, molecular characterization,  
47 spoligotyping, MIRU-VNTR-typing, cattle

48 **Short title:** *Mycobacterium bovis* from cattle in Algeria

49



## 50 **Introduction**

51 Bovine tuberculosis (bTB) represents a veterinary and public health threat of global relevance.  
52 Despite the importance of the disease, there is no official data concerning the true prevalence  
53 of bTB in many low and middle-income countries. This also holds for Algeria, despite the fact  
54 that bTB is a notifiable animal disease [1]. Although multiple disease control plans are  
55 implemented by the Algerian official's health services, there are still many obstacles to control  
56 and eradicate bTB. Skin test and meat inspection at slaughter represent the main methods in  
57 bTB surveillance. Application of culture and molecular diagnostic methods is extremely limited  
58 in low-income countries due to high costs and time requirements [2]. Several strategies  
59 assessing cost effectiveness and socio-economic factors have been proposed to fight bTB [3].  
60 In Algeria, we suspect that most bTB-infected herds are geographically clustered in the north-  
61 east of the country because of the high concentration of cattle compared to other areas. It is  
62 assumed that transmission of bTB in Algeria is mainly attributed to cattle movement, although  
63 a study conducted in France by Palisson [4] disclosed the key role played by the spatial  
64 neighborhood of infected herds. Genotyping tools are crucial for unveiling pathogen  
65 transmission routes in bTB and tracing back sources of infections. The main goal of the present  
66 study was molecular typing of the Algerian *M. bovis* population in order to improve our  
67 understanding of disease epidemiology and bTB spread in Algeria. Spoligotyping [5, 6] and  
68 mycobacterial interspersed repetitive units-variable number of tandem repeats (MIRU-VNTR)  
69 analyses were used [7], since the combination of these two genetic markers is known to be a  
70 powerful tool to study the molecular epidemiology in a *M. bovis* population [8]. The DR region  
71 (direct repeat) analyzed by spoligotyping is a unique region (locus) which contains well-  
72 conserved 36 bp direct repeats separated by variable sequences from 35 to 41 bp. These  
73 sequences vary from one strain to another by their length, their sequence and their number. The  
74 differentiation of the strains is based on the variability of the number of DRs and on the presence

75 or absence of the particular spacers [5]. Because of its simplicity, its binary result format and  
76 its high reproducibility, spoligotyping is widely used for the molecular epidemiology of  
77 members of the *M. tuberculosis* complex (MTC) [9]. However, this method is less resolving  
78 than either VNTR typing or restriction enzyme analysis, limiting its usefulness in forensic  
79 investigations [10]. The VNTR loci containing a variable number of tandem repeats are  
80 amplified by PCR using specific primers and the size of the product is determined by gel  
81 electrophoresis. The MIRU-VNTR technique is faster than restriction fragment length  
82 polymorphism (RFLP) analysis, easy to interpret, more reproducible between laboratories [11]  
83 and gives a higher degree of discrimination than spoligotyping [12].

84

## 85 **Materials and Methods**

### 86 **Bacterial strains and molecular identification**

87 A total of 3,848 cattle were inspected for bTB at four slaughterhouses in the north part of  
88 Algeria between January and May 2017. The origin of the animals could not be determined due  
89 to the lack of an efficient livestock identification system in Algeria. The most important target  
90 organs for tuberculosis lesions, i.e. the respiratory tract (lung tissue and lymph nodes), the  
91 thoracic cavity, retropharyngeal lymph nodes, liver and kidney, were inspected at slaughter.  
92 Tissue samples were taken during inspection of carcasses for the presence of visible lesions  
93 suspected of tuberculosis. The cut surfaces of lymph node **are** examined carefully for the  
94 presence of abscess, caseous mass and tubercles. Out of 3,848 animals screened, 184 carcasses  
95 presented with lesions suspicious of bTB and samples from single organs of 105 animals were  
96 submitted **to** microbiological examination. Organs predominantly affected were respiratory  
97 tract and lymph nodes. The tissue samples were decontaminated according to the modified

98 Petroff's method [13, 14]. Briefly, an amount of 5 ml NaOH solution (4%) was added to about  
99 10 g of tissue, minced by a mortar in 4 ml of sterile distilled water, and incubated for 15 min.  
100 The suspension was diluted by 10 ml of sterile distilled water and then centrifuged at 3000 x g  
101 for 20 min. The pellet was used as an inoculum to solid Löwenstein-Jensen medium.  
102 Mycobacteria were cultured at Pasteur Institute of Algiers (IPA), Reference Laboratory for  
103 Tuberculosis and Mycobacteria for six to eight weeks according to standard protocols.

104 The molecular characterization of isolates was performed at the National Reference Laboratory  
105 for Bovine Tuberculosis at the Friedrich-Loeffler-Institut, Jena, Germany. Using bacterial DNA  
106 extracted by the thermal lysis method described by Berg et al. [15], strains were identified as  
107 members of the MTC using the RD9 PCR. The PCR was performed using oligonucleotide  
108 primers for detection of the RD9 deletion. A PCR reaction mix consisted of 0.5 µl of each  
109 primer (100 µM), 0.2 µl of Taq polymerase (Taq PCR Core Kit, Qiagen, Germany), 2 µl 10x  
110 PCR buffer, 4 µl of Q solution, 0.4 µl of 0.25 mM MgCl<sub>2</sub>, 0.4 µl dNTPs (10 mM each) and 1  
111 µl of purified DNA in a final volume of 20 µl. PCR amplification program included one  
112 denaturation step (15 min, 96°C) followed by 35 cycles of 1 min at 95°C, 1 min at 60°C and 1  
113 min at 72°C. PCR amplification products were separated in 1.5 % agarose gels after  
114 electrophoresis at 110 V for 1 h and visualized using ethidium bromide under UV light. As  
115 positive control served the strains *M. bovis* BCG (DSMZ 43990, ATCC 27289) and  
116 *M. tuberculosis* H37Rv.

## 117 **Molecular typing**

118 Spoligotyping was performed using the DNA microarray format of the ArrayStrip platform  
119 (Alere Technologies GmbH [now Abbott], Jena, Germany) according to the manufacturer's  
120 instructions as described by Ruettger et al. [6]. Briefly, after DNA extraction with the thermal  
121 lysis method, DR regions were amplified using 5'-biotinylated primers DRa/DRb [5], and then

122 allowed to hybridize on the microarray (hybridization at 60°C, wash steps at 55°C). Finally,  
123 arrays were scanned and analyzed by the ArrayMate™. The Alere Technologies software  
124 measures the signal intensity of each probe and compares the profiles automatically to those  
125 available at the *M. bovis* Spoligotype Database ([www.mbovis.org](http://www.mbovis.org) [16]) and the SITVIT1  
126 database ([www.pasteur-guadeloupe.fr:8081/SITVIT\\_ONLINE/index.jsp](http://www.pasteur-guadeloupe.fr:8081/SITVIT_ONLINE/index.jsp) [17]).

127 MIRU-VNTR typing of the *M. bovis* strains was carried out by in-house technique [18],  
128 according to Supply et al. [7] with slight modifications, as for VNTR locus 2461-PCR the  
129 primers described by Frothingham et al. [19] and for VNTR locus 2163a-PCR the primers of  
130 Skuce et al. [20] were used. DNA was purified using the High Pure PCR Template Preparation  
131 Kit, Roche Life Science (USA). The PCRs were performed using 0.8 µl of each primer (20 µM;  
132 MWG Eurofins, Germany), 0.1 µl of Taq polymerase (HotStarTaq DNA Polymerase, Qiagen,  
133 Germany), 2 µl 10x PCR buffer, 4 µl 5x Q solution, 0.4 µl 0.25 mM MgCl<sub>2</sub>, 0.8 µl dNTPs (10  
134 mM each) and 1 µl of purified DNA in a final volume of 20 µl. PCR amplification program  
135 included one denaturation step (15 min, 95°C) followed by 35 cycles of 1 min at 94°C, 1 min  
136 at 59°C and 120 s at 72°C. The PCR for VNTR locus 2163a differed with a 25 µl reaction mix  
137 (0.5 µl of each primer, 0.1 µl of Hotstar Taq polymerase, 2.5 µl 10x PCR buffer, 1.25 µl 5x Q  
138 solution, 0.5 µl dNTPs and 2 µl of purified DNA) and an annealing temperature of 55°C during  
139 amplification [20]. PCR amplification products were separated in 1.5 % agarose gels after  
140 electrophoresis at 100 V for 2 h 15 min and visualized using ethidium bromide under UV light.

141 Allelic diversity estimations were calculated using the Hunter-Gaston discriminatory index  
142 (HGDI) [21]. The HGDI was used to determine the allelic diversity within each MIRU-VNTR  
143 locus and the genotypic diversities (discriminatory power) of the spoligotyping assays, the 19-  
144 locus MIRU-VNTR and the combination of both methodologies, using the website application

145 <http://insilico.ehu.es/>. The sample profiles were analyzed by BioNumerics (version 7.6.2,  
146 Applied Maths, The Netherlands) to assess the overall genetic similarity of the strains.

147

## 148 **Results and Discussion**

### 149 **Bacterial strains and molecular identification**

150 **Of a total of** 105 samples submitted to microbiological examination, 60 samples showed  
151 bacterial growth on Löwenstein-Jensen medium. With a first screening by analysis for acid-fast  
152 bacteria, all 60 samples yielded a positive signal and were subsequently subjected to DNA  
153 extraction. Subsequent RD9 PCR showed that all 60 strains belonged to *M. tuberculosis*  
154 complex (MTC) whereas non-tuberculous mycobacteria were not isolated.

### 155 **Spoligotyping**

156 Of the 60 MTC positive strains, 59 were identified as *M. bovis* by spoligotyping, **one** as *M.*  
157 *caprae*. Among the 60 strains, 16 different spoligotypes were identified (Table 1). Four new  
158 spoligotypes have been found in the present study and were subsequently submitted to the *M.*  
159 *bovis* spoligotype database ([www.mbovis.org](http://www.mbovis.org)). Those new spoligotypes received the ID  
160 numbers SB2520 (n = 1), SB2521 (n = 5), SB2522 (n = 1), and SB2523 (n = 1). Two of the  
161 four new spoligotypes, SB2520 and SB2521, have been described recently in Algerian cattle  
162 and human samples respectively [22].

163

164 **Table 1. Spoligotype patterns of 59 *M. bovis* and one *M. caprae* strains and their relative frequencies.**

| SB No. | Spoligotype                                   |                 | No. of strains | Frequency [%] | SIT  | Family       |
|--------|-----------------------------------------------|-----------------|----------------|---------------|------|--------------|
|        | binary code                                   | octal code      |                |               |      |              |
| SB0120 | 11011111011111101111111111111111111100000     | 67677377777600  | 20             | 33.3          | 482  | BOV_1        |
| SB0121 | 11011111011111101111111111111111111100000     | 67677367777600  | 13             | 21.7          | 481  | BOV_1        |
| SB0134 | 11000111011111101111111111111111111100000     | 61677377777600  | 7              | 11.7          | 665  | BOV_1        |
| SB2521 | 11000111011111101110111111111111111100000     | 61677357777600  | 5              | 8.3           | n.k. | n.k.         |
| SB0339 | 1101111101111110111101111000011111111100000   | 676773674177600 | 2              | 3.3           | 696  | BOV_1        |
| SB0828 | 110111110111111011111111111111111110111100000 | 676773777773600 | 2              | 3.3           | 1047 | BOV_1        |
| SB1542 | 11000111000111101111111111111111111100000     | 61617377777600  | 2              | 3.3           | n.k. | BOV          |
| SB0119 | 1101111101111110011110111111111111111100000   | 67676367777600  | 1              | 1.7           | 695  | BOV          |
| SB0818 | 110111110111111011111111111111111110111100000 | 676773777767600 | 1              | 1.7           | 1044 | BOV_1        |
| SB0822 | 11001111011111101111111111111111111100000     | 63677377777600  | 1              | 1.7           | 997  | BOV_1        |
| SB0848 | 11011111011101101111011111111111111100000     | 67673367777600  | 1              | 1.7           | 1010 | BOV_1        |
| SB1452 | 11011110001111001111011111111111111100000     | 67436367777600  | 1              | 1.7           | 1595 | BOV          |
| SB2520 | 110001110111111011111111111011111111100000    | 616773777377600 | 1              | 1.7           | n.k. | n.k.         |
| SB2522 | 110111110111111011111001111111101111100000    | 676773717757600 | 1              | 1.7           | n.k. | n.k.         |
| SB2523 | 1101111101111110100111111111111111100000      | 67677237777600  | 1              | 1.7           | n.k. | n.k.         |
| SB0835 | 010000000000000011111111110111011111100000    | 200003777357600 | 1              | 1.7           | 978  | BOV_4 Caprae |
|        | Total                                         |                 | 60             | 100           |      |              |

165 **n.k.:** not known; **SIT:** spoligo-international type according to the SITVIT1 nomenclature; **BOV:** Bovine.

166 The binary code is represented by 43 digits. The number 0 indicate the absence of signal and the number 1 indicate the presence of signal.

167 The predominant spoligotypes found were SB0120 (n = 20) and SB0121 (n = 13), both  
168 belonging to the family BOV\_1 and differing in only one spacer (no. 21), followed by SB0134  
169 (n = 7), SB2521 (n = 5), and SB0828 (n = 2). The **currently** most prevalent spoligotypes  
170 SB0120, SB0121, and SB0134 were already detected by a study conducted 10 years earlier in  
171 Algeria [23]. Of note, the two new types SB2522 and SB2523 as well as three additional  
172 spoligotypes, namely SB0119 (n = 1), SB0848 (n = 1), and SB1542 (n = 2) have not been  
173 reported in Algeria before.

174 Presence of spoligotypes SB0121, SB0120, and SB0134 was also reported for the neighboring  
175 countries Morocco and Tunisia as well as France [24-26]. Interestingly, the second most  
176 frequently found spoligotype in Morocco, type SB0265, was not detected in our study in  
177 Algerian cattle although in silico analysis of whole genome sequence (WGS) data from four  
178 Algerian human *M. bovis* isolates [27] could assign two of the strains to SB0265 implying that  
179 the spoligotype is present in Algeria, too. The BCG cluster associated spoligotypes SB0120 and  
180 SB0121 are circulating nearly worldwide in Europe, Africa, and America [28, 29]. Spoligotype  
181 SB0134 is also frequent in many African countries (e.g., Tunisia, Morocco, Mali and Ethiopia)  
182 [30-33]. The new type SB2520 identified in our study has been recently found in Ethiopia [33].  
183 The spoligotypes SB0339 and SB0119 are common on the Iberian peninsula, thereof SB0339  
184 frequently reported for Spain and SB0119 in Portugal, and both were also reported for Morocco  
185 [24, 34, 35]. The spoligotype SB0818 has been reported in Italy [36] and France [26, 37],  
186 SB0848 in the neighboring country Tunisia [31] and in Portugal [38]. According to the database  
187 [www.mbovis.org](http://www.mbovis.org), spoligotype SB1542 was previously detected in Italy and *M. caprae* SB0835  
188 in France. *M. caprae* has been identified mainly in continental Europe in the alpine region [39]  
189 and Spain [40]. In the study presented here only one *M. caprae* isolate with the spoligotype  
190 SB0835 was detected. Only few data exist on the detection of *M. caprae* in Africa. In Algeria

191 two isolates of spoligotypes SB1451 and SB0835 were described before [22, 23], pointing to a  
192 rare occurrence of *M. caprae* in this country.

193 Nowadays, the composition of the spoligotypes in North Africa (Morocco, Algeria, Tunisia) is  
194 dominated by spoligotypes SB120, SB121 and SB0134 possibly having evolved from common  
195 ancestral strains introduced since decades from Europe [23-25]. Indeed, this can be explained  
196 by recent imports, given the incomplete eradication of bTB in Europe. France represents the  
197 country from which the majority of cattle in Algeria were imported. According to WAHIS  
198 interface, France is declared “officially tuberculosis free” (OTF) by the EU but bTB still exists  
199 and single outbreaks are repeatedly reported for cattle herds and wildlife in some areas of the  
200 country. Thereby, SB0120, SB121 and SB0134 are the major spoligotypes distributed in  
201 animals in France, too [26]. Moreover, a study conducted in Tunisia by Siala and colleagues  
202 analysed human *M. bovis* isolates and found 13 different spoligotypes, thereof, SB0120 and  
203 SB0121 as the dominating types [41].

204

#### 205 **MIRU-VNTR typing**

206 Out of 60 strains of this study, VNTR profiles could be generated for 42 *M. bovis* strains.  
207 Missing success in the remaining cases might have been due to low DNA quality or quantity.  
208 A panel of 19 loci was chosen for conducting the MIRU-VNTR (Table 2).

209



210 **Table 2. Allele diversity of the 19-locus MIRU-VNTR in 42 Algerian *M. bovis* strains.**

| Locus |              | Number of strains with the respective number of copies |    |    |    |    |    |    |   |    |    |    |       |    | Allele diversity (HGDI) |
|-------|--------------|--------------------------------------------------------|----|----|----|----|----|----|---|----|----|----|-------|----|-------------------------|
| VNTR  | Alias        | 1                                                      | 2  | 3  | 4  | 5  | 6  | 7  | 8 | 9  | 10 | 11 | 12-15 | 16 |                         |
| 2165  | ETR-A        | 0                                                      | 0  | 1  | 7  | 11 | 15 | 8  | 0 | 0  | 0  | 0  | 0     | 0  | 0.7573                  |
| 3232  | QUB3232      | 0                                                      | 0  | 2  | 1  | 0  | 17 | 13 | 8 | 1  | 0  | 0  | 0     | 0  | 0.7178                  |
| 2163a | QUB11a       | 2                                                      | 0  | 0  | 0  | 1  | 0  | 0  | 0 | 15 | 17 | 5  | 0     | 1  | 0.6927                  |
| 2163b | QUB11b       | 0                                                      | 16 | 8  | 16 | 1  | 0  | 1  | 0 | 0  | 0  | 0  | 0     | 0  | 0.6887                  |
| 2461  | ETR-B        | 0                                                      | 0  | 1  | 20 | 19 | 2  | 0  | 0 | 0  | 0  | 0  | 0     | 0  | 0.5796                  |
| 3007  | MIRU27       | 3                                                      | 17 | 22 | 0  | 0  | 0  | 0  | 0 | 0  | 0  | 0  | 0     | 0  | 0.5703                  |
| 577   | ETR-C        | 1                                                      | 1  | 13 | 2  | 25 | 0  | 0  | 0 | 0  | 0  | 0  | 0     | 0  | 0.5598                  |
| 4052  | QUB26        | 3                                                      | 1  | 2  | 5  | 30 | 1  | 0  | 0 | 0  | 0  | 0  | 0     | 0  | 0.4785                  |
| 3192  | MIRU31/ETR-E | 0                                                      | 3  | 33 | 6  | 0  | 0  | 0  | 0 | 0  | 0  | 0  | 0     | 0  | 0.3659                  |
| 580   | MIRU04/ETR-D | 2                                                      | 0  | 38 | 1  | 0  | 0  | 0  | 0 | 1  | 0  | 0  | 0     | 0  | 0.1823                  |
| 2687  | MIRU24       | 2                                                      | 40 | 0  | 0  | 0  | 0  | 0  | 0 | 0  | 0  | 0  | 0     | 0  | 0.0929                  |
| 154   | MIRU02       | 1                                                      | 41 | 0  | 0  | 0  | 0  | 0  | 0 | 0  | 0  | 0  | 0     | 0  | 0.0476                  |
| 802   | MIRU40       | 1                                                      | 41 | 0  | 0  | 0  | 0  | 0  | 0 | 0  | 0  | 0  | 0     | 0  | 0.0476                  |
| 2059  | MIRU20       | 1                                                      | 41 | 0  | 0  | 0  | 0  | 0  | 0 | 0  | 0  | 0  | 0     | 0  | 0.0476                  |
| 2996  | MIRU26       | 0                                                      | 0  | 0  | 1  | 41 | 0  | 0  | 0 | 0  | 0  | 0  | 0     | 0  | 0.0476                  |
| 4348  | MIRU39       | 0                                                      | 41 | 1  | 0  | 0  | 0  | 0  | 0 | 0  | 0  | 0  | 0     | 0  | 0.0476                  |
| 960   | MIRU10       | 0                                                      | 42 | 0  | 0  | 0  | 0  | 0  | 0 | 0  | 0  | 0  | 0     | 0  | 0                       |
| 1644  | MIRU16       | 0                                                      | 0  | 42 | 0  | 0  | 0  | 0  | 0 | 0  | 0  | 0  | 0     | 0  | 0                       |
| 2531  | MIRU23       | 0                                                      | 0  | 0  | 42 | 0  | 0  | 0  | 0 | 0  | 0  | 0  | 0     | 0  | 0                       |

211 **ETR:** Exact Tandem Repeat; **MIRU:** Mycobacterial Interspersed Repetitive Unit; **QUB:** Queen's  
 212 University Belfast.

213

214 Evaluated loci were selected according to the 12-locus panel proposed in the MIRU-VNTR plus  
 215 web site ([www.miru-vntrplus.org](http://www.miru-vntrplus.org)) in combination with the panel proposed by the European  
 216 Reference Center for Bovine Tuberculosis (EU-RL bTB, VISAVET Health Surveillance  
 217 Centre, Universidad Complutense de Madrid) for the molecular typing of *M. bovis* in Europe.  
 218 Among them, the ETR loci (VNTR580, 2165, 2461, and 3192) had been evaluated by Sahraoui  
 219 et al. [42] for Algerian strains previously. Additionally, the QUB loci (VNTR2163a, 2163b,

220 3232, and 4052) and VNTR2996 were included as these are regarded highly discriminative for  
221 *M. bovis* strains.

222 Overall, seven loci (VNTR577, 2163a, 2163b, 2165, 2461, 3007, and 3232) presented a high  
223 discriminatory power (HGDI > 0.50, Table 2). Our findings corroborate **therefore** earlier data  
224 obtained in Tunisia [25] which showed a high resolution of VNTR2163a, 2163b, 2461, 2165,  
225 and 3232, while the four loci VNTR577, 2165, 2461, and 3007, showed a high discriminatory  
226 power for Algerian strains also in previous data sets [42]. Furthermore, this is consistent with  
227 data reported for *M. bovis* strains from Mexico and Germany [43, 44]. Rodriguez-Campos et  
228 al. [45] found only a very low allele diversity for locus VNTR2163b (HGDI = 0.08), but  
229 analyzed only SB0121 strains. The two loci VNTR3192 and 4052 showed moderate allelic  
230 diversity (HGDI = 0.36 and HGDI = 0.47, respectively) and locus VNTR580 a low allelic  
231 diversity (HGDI = 0.18). Very low allele diversity (HGDI <0.15) was observed for six loci  
232 (VNTR154, 802, 2059, 2687, 2996, and 4348). By contrast, Yang et al. [46], found a high allele  
233 diversity in the loci VNTR580 (HGDI = 0.607) and 802 (HGDI = 0.495) but no resolution for  
234 loci VNTR2059, 2687 and 2996. This difference may be related especially to the geographic  
235 region from which the strains have been isolated, as we analyzed exclusively bovine strains  
236 from Algeria whereas Yang et al. typed strains from Sika deer in Northern China [46]. Finally,  
237 there is a difference in the resolution of loci between MTC species. For example, loci VNTR960  
238 and 2531 are reported very discriminatory for *M. tuberculosis* [47], but performed less well for  
239 *M. bovis* in the present study. VNTR2996 demonstrates a very low allele diversity in the present  
240 study (HGDI = 0.047). A possible explanation could be, that the number of strains analyzed in  
241 the present study was smaller and therefore less variance found. No allele diversity (HGDI = 0)  
242 was observed with the loci VNTR960, 1644, and 2531 which suggests that these loci are not  
243 suitable for typing Algerian *M. bovis* strains. Overall, analysis of 19-locus MIRU-VNTR in 42

244 strains revealed 32 different profiles among which 27 were found only in a single strain (Table  
245 3).

246

247 **Table 3. Comparison of the discriminatory power of spoligotyping, 19-locus MIRU-VNTR**  
248 **typing and the combination of both methods.**

| <b>Variability</b>                       | <b>Spoligotyping</b> | <b>MIRU-<br/>VNTR</b> | <b>Spoligotyping and<br/>MIRU-VNTR</b> |
|------------------------------------------|----------------------|-----------------------|----------------------------------------|
| <b>No. of strains included</b>           | 60                   | 42                    | 42                                     |
| <b>Total number of profiles (n)</b>      | 16                   | 32                    | 33                                     |
| <b>Number of individual profiles (n)</b> | 9                    | 27                    | 28                                     |
| <b>Discriminatory index (HGDI)</b>       | 0.8294               | 0.9779                | 0.9826                                 |

249

250 The combination of MIRU-VNTR allele diversity and spoligotyping pattern demonstrated a  
251 large genotypic variety resulting in 33 profiles (Fig 1). Thereby spoligotypes were typed in  
252 sub-profiles, e.g. SB0120 in 13 sub-profiles, SB0121 in five, and SB0134 in five, reflecting the  
253 heterogeneity of strains causing bTB in Algeria.

254

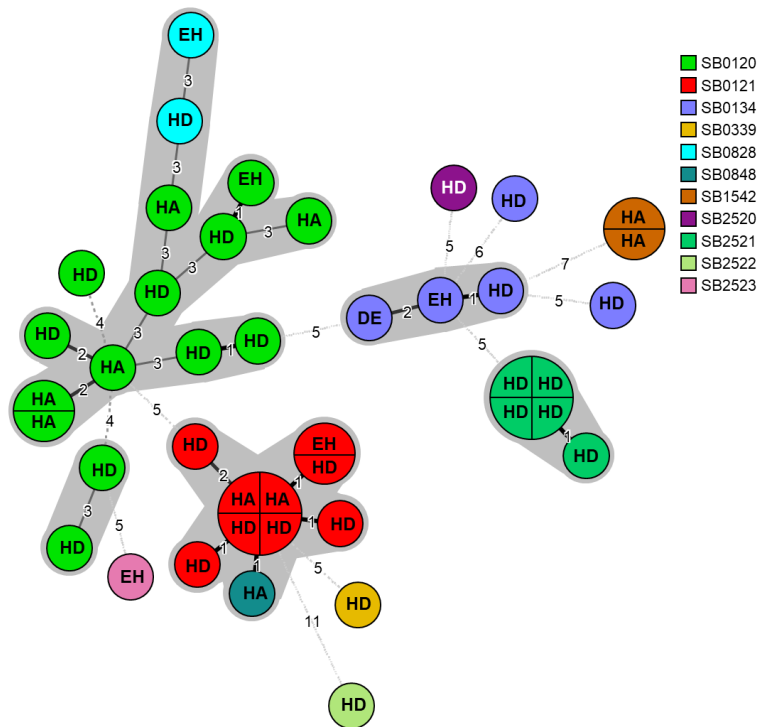

255

256 **Fig 1. Minimum-spanning-tree based on the combination of spoligotyping and MIRU-VNTR**  
 257 **results of 42 *M. bovis* strains isolated from slaughtered cattle in Algeria.**

258 Each node represents a unique spoligotype-VNTR sub-profile. If more than one strain exhibited the  
 259 identical profile the node is separated. Nodes closer than three differences are put into one cluster  
 260 (gray background). The number of differing alleles (repeat number of MIRU-VNTR and  
 261 absence/presence of spacer for spoligotyping) between two nodes is indicated by the respective  
 262 number. The letter inside the nodes represent the slaughterhouse the strains came from (**HD**: Hussein  
 263 Dey, **HA**: Hadjout, **EH**: El Harrach, **DE**: Dellys) (BioNumerics, version 7.6.2).

264

265 Scientific literature describes several routes of transmission of animal tuberculosis [48, 49]. The  
 266 emergence of tuberculosis in wildlife [50] may constitute a continuous source for reinfection  
 267 of cattle and could be at the origin of the persistence of bTB worldwide. This particularly holds  
 268 for wild boar, which represent a new threat for livestock animals and agriculture in Algeria.  
 269 Hence, the pathway of transmission of this pathogen in Algeria including wildlife needs to be  
 270 studied. El Mrini et al. [51] described cases of tuberculosis due to *M. bovis* in Eurasian wild  
 271 boar in Morocco. Without neglecting the role of re-infections within single cattle herds,

272 mycobacteria may survive decades unrecognized in several biological niches due to the chronic  
273 subclinical course of infection, leading to persisting bTB in Algerian livestock. On the other  
274 hand, all our *M. bovis* strains were recovered from lungs and associated lymph nodes,  
275 suggesting a primarily airborne transmission of bTB to the cattle under study here and,  
276 consequently, an intimate contact between the respective animals. Indeed, combination of  
277 MIRU-VNTR allele diversity and spoligotyping pattern allowed us to unveil some possible  
278 epidemiological links. Constructing a minimum-spanning-tree revealed five clusters  
279 (spoligotype and MIRU-VNTR profile differing in 3 alleles in maximum) with the largest one  
280 comprising of 14 strains. Two sub-profiles (one in the SB0121 cluster and the other in the  
281 SB2521 cluster) contained four strains, that were identical in their spoligotype and MIRU-  
282 VNTR profiles, two additional sub-profiles were represented by two strains each. The four  
283 strains of the SB2521 sub-profile were all isolated at the slaughterhouse Hussein Dey. It is  
284 tempting to assume that cross-infection occurred between animals within one herd or the same  
285 area. In contrast, both sub-profiles with four and two strains, respectively, within the  
286 spoligotype SB0121 contained strains probably from different areas in Algeria as the strains  
287 were isolated from cattle slaughtered in different abattoirs. This includes the slaughterhouses  
288 of Hussein Dey and Hadjout which are 88 km distant from each other (source of the strains  
289 belonging to the four strain sub-profile), as well as slaughterhouses in El Harrach and Hussein  
290 Dey which are more proximate to each other. As we consider it unlikely that one owner had  
291 delivered his cattle to different slaughterhouses, the occurrence of identical spoligotype/MIRU-  
292 VNTR profiles in different geographical areas might be explained by the trade of animals  
293 between herds in those areas. In two cluster, two different spoligotypes (SB0848 and SB0121  
294 as well as SB0828 and SB0120) are combined. Both pairs differ from each other only in one  
295 spacer (no. 13 is missing in SB0848 compared to SB0121 as well as no. 34 is missing in SB0282  
296 compared to SB0120) it might be possible that spoligotypes SB0828 and SB0848 may have

297 originated from spoligotype SB0120 and SB0121, respectively, by undergoing a genetic  
298 mutation on spacer 13 respectively 34. The singular SB0848 strain and four SB0121 strains  
299 possess identical MIRU-VNTR profiles, supporting the close relatedness of both spoligotypes.

300 Beyond disclosing recent transmission events and microevolution of *M. bovis* strains,  
301 genotyping of bacteria also may allow for a reconstruction of phylogeography and evolutionary  
302 history of these pathogens [52]. Spoligotyping in combination with other genomic markers,  
303 such as deletions [52, 53] and single-nucleotide polymorphisms (SNPs) have been used to  
304 construct a phylogeography for *M. bovis* strains. The clonal complexes named “African 1” (Af1,  
305 characterized by missing of spacer 30) and “African 2” (Af2, missing spacers 3-7) were  
306 described as geographically localized in Central-West and East Africa, respectively. The cluster  
307 “European 1” (Eu1, missing spacer 11) is found mainly on the British Islands, in New Zealand,  
308 Australia, South Africa, and Korea and “European 2” (Eu2, missing spacer 21) on the Iberian  
309 peninsula and Western Europe [52-54]. Additional to those four ‘classical’ phylogenetic  
310 lineages recently eight new clonal lineages were defined on the basis of WGS data of more than  
311 3,300 *M. bovis* isolates and spoligotypes where affiliated to certain phylogenetic lines [52]. Six  
312 out of the 16 spoligotypes detected in our study are also mentioned in this recent publication.  
313 The discriminatory capacity of spoligotyping is limited since diversity is measured at a single  
314 locus prone to convergent evolution and phylogenetic distances cannot be reliably inferred [55].  
315 Despite this limitation our findings might point towards the phylogenetic positions of strains  
316 and indicate the multiplicity of clonal lines circulating in Algeria. The signature profile of the  
317 *M. bovis* BCG vaccine strain is the absence of spacers 3, 9, 16, and 39 to 43 [29]. The BCG  
318 cluster is divided into two groups: the BCG-like group, represented by SB0121, and the ancestor  
319 BCG-like SB0120. In the present study, all *M. bovis* strains lacked spacers 3, 9, 16, and 39 to  
320 43 and were therefore grouped to the BCG cluster (Table 1). On the African continent, the  
321 ancestral BCG-like cluster is predominantly found in Algeria, Zambia [56], and Mozambique

322 [57]. The cluster Af1, Af2, and Eu1 have not been found in cattle outside of the previous  
323 mentioned regions [24]. Further studies, implicating WGS technology, will be required to  
324 determine if or to what extent the current bTB epizootic in Algeria originates from the long-  
325 term evolution during which animal-adapted MTC, i.e. *M. caprae* and *M. bovis*, might have  
326 originally come out of Africa [58] or on a more recent (re)introduction of *M. bovis* from Europe  
327 as discussed above.

328

## 329 **Conclusion**

330 Until now, tuberculosis still represents a serious burden in Algeria for both, humans and  
331 animals. The BCG cluster derived spoligotypes (SB0120, SB0121) are the most frequent types  
332 circulating in Algeria and also worldwide. The analysis of four MIRU-VNTR loci [ETR A,  
333 VNTR2163b (QUB11b), 2163a (QUB11a), and 3232 (QUB3232)] would be sufficient to  
334 characterize Algerian *M. bovis* strains deeply. Nevertheless, the combination of MIRU-VNTR  
335 and spoligotyping is highly advisable. The association of those two techniques demonstrates  
336 the heterogenic population of Algerian *M. bovis* strains, indicating that different strains are  
337 responsible for bTB in Algeria. However, the lack of information concerning the origin of cattle  
338 (herd, country) currently impairs the unveiling of transmission routes of bTB in Algeria and  
339 must be implemented as part of the control program for the eradication of bovine tuberculosis  
340 in Algeria.

341

## 342 **Acknowledgments**

343 The author's address special thanks to the technicians Uta Brommer and Josefine Bach at FLI,  
344 Jena, Germany, for their excellent support to perform the molecular methods. We are grateful

345 to Prof. Dr. Dr. h.c. Thomas C. Mettenleiter for providing the opportunity to perform the  
346 practical part of this work at the FLI, Jena, Germany.

347

## 348 **References**

- 349 1. Journal Officiel de la Republique Algerienne (JORA) N°16. Decret exécutif n°06-118 du  
350 12 Safar 1427 correspondant au 12 Mars 2006 complétant le décret exécutif n°88-252 du  
351 31 Décembre 1988 fixant les conditions d'exercice à titre privé des activités de médecine  
352 vétérinaire et de chirurgie des animaux. 2006-03-15.
- 353 2. Asebe G. Molecular Characterization of Mycobacterium bovis and its Significance: Role  
354 for Control of Zoonotic Tuberculosis in Africa. Journal of Medical Diagnostic Methods.  
355 2017;06(03):250. doi: 10.4172/2168-9784.1000250.
- 356 3. Riviere J, Le Strat Y, Hendrikx P, Dufour B. Cost-effectiveness evaluation of bovine  
357 tuberculosis surveillance in wildlife in France (Sylvatub system) using scenario trees. PLoS  
358 One. 2017;12(8):e0183126. Epub 2017/08/12. doi: 10.1371/journal.pone.0183126. pmid:  
359 28800642.
- 360 4. Palisson A, Courcoule A, Durand B. Role of Cattle Movements in Bovine Tuberculosis  
361 Spread in France between 2005 and 2014. PLoS One. 2016;11(3):e0152578. Epub  
362 2016/03/29. doi: 10.1371/journal.pone.0152578. pmid: 27019291.
- 363 5. Kamerbeek J, Schouls L, Kolk A, van Agterveld M, van Soolingen D, Kuijper S, et al.  
364 Simultaneous detection and strain differentiation of Mycobacterium tuberculosis for  
365 diagnosis and epidemiology. J Clin Microbiol. 1997;35(4):907-14. pmid: 9157152.
- 366 6. Ruettinger A, Nieter J, Skrypnik A, Engelmann I, Ziegler A, Moser I, et al. Rapid  
367 spoligotyping of Mycobacterium tuberculosis complex bacteria by use of a microarray  
368 system with automatic data processing and assignment. J Clin Microbiol. 2012;50(7):2492-  
369 5. doi: 10.1128/JCM.00442-12. pmid: 22553239.
- 370 7. Supply P, Allix C, Lesjean S, Cardoso-Oelemann M, Rusch-Gerdes S, Willery E, et al.  
371 Proposal for standardization of optimized mycobacterial interspersed repetitive unit-  
372 variable-number tandem repeat typing of *Mycobacterium tuberculosis*. J Clin Microbiol.  
373 2006;44(12):4498-510. doi: 10.1128/JCM.01392-06. pmid: 17005759.
- 374 8. Marianelli C, Amato B, Boniotti MB, Vitale M, Pruiti Ciarello F, Pacciarini ML, et al.  
375 Genotype diversity and distribution of Mycobacterium bovis from livestock in a small,  
376 high-risk area in northeastern Sicily, Italy. PLoS Negl Trop Dis. 2019;13(7):e0007546.  
377 Epub 2019/07/16. doi: 10.1371/journal.pntd.0007546. pmid: 31306431.
- 378 9. Couvin D, Rastogi N. La mise en place de bases de données des génotypes circulants du  
379 complexe Mycobacterium tuberculosis et des outils web permettant de mieux surveiller,  
380 comprendre et contrôler l'épidémie de la tuberculose dans le monde. 2014;2014(12):pp. 40-  
381 53.



- 382 10. Kao RR, Price-Carter M, Robbe-Austerman S. Use of genomics to track bovine  
383 tuberculosis transmission. *Rev Sci Tech.* 2016;35(1):241-58. Epub 2016/05/25. doi:  
384 10.20506/rst.35.1.2430. pmid: 27217181.
- 385 11. Duignan A, Good M, More SJ. Quality control in the national bovine tuberculosis  
386 eradication programme in Ireland. *Rev Sci Tech.* 2012;31(3):845-60. Epub 2013/03/26.  
387 doi: 10.20506/rst.31.3.2166. pmid: 23520738.
- 388 12. Durr PA, Hewinson RG, Clifton-Hadley RS. Molecular epidemiology of bovine  
389 tuberculosis. I. *Mycobacterium bovis* genotyping. *Rev Sci Tech.* 2000;19(3):675-88. Epub  
390 2000/01/11. doi: 10.20506/rst.19.3.1241. pmid: 11107611.
- 391 13. Kent PT, Kubica GP. *Public Health Mycobacteriology: A Guide for the Level III*  
392 *Laboratory.* Centers for Disease Control, Atlanta, GA, 1985.
- 393 14. Tripathi K, Tripathi P, Nema S, Shrivastava A, Dwiwedi K, Dhanvijay A. Modified  
394 Petroff's Method: an Excellent Simplified Decontamination Technique in Comparison with  
395 Petroff's Method. *International Journal of Recent Trends in Science And Technology.*  
396 2014;10(3):461-4.
- 397 15. Berg S, Firdessa R, Habtamu M, Gadisa E, Mengistu A, Yamuah L, et al. The burden of  
398 mycobacterial disease in ethiopian cattle: implications for public health. *PLoS One.*  
399 2009;4(4):e5068. doi: 10.1371/journal.pone.0005068. pmid: 19352493.
- 400 16. Smith NH, Upton P. Naming spoligotype patterns for the RD9-deleted lineage of the  
401 *Mycobacterium tuberculosis* complex; [www.Mbovis.org](http://www.Mbovis.org). *Infect Genet Evol.*  
402 2012;12(4):873-6. doi: 10.1016/j.meegid.2011.08.002. pmid: 21855653.
- 403 17. Demay C, Liens B, Burguiere T, Hill V, Couvin D, Millet J, et al. SITVITWEB--a publicly  
404 available international multimarker database for studying *Mycobacterium tuberculosis*  
405 genetic diversity and molecular epidemiology. *Infect Genet Evol.* 2012;12(4):755-66. Epub  
406 2012/03/01. doi: 10.1016/j.meegid.2012.02.004. pmid: 22365971.
- 407 18. Kohl TA, Utpatel C, Niemann S, Moser I. *Mycobacterium bovis* Persistence in Two  
408 Different Captive Wild Animal Populations in Germany: a Longitudinal Molecular  
409 Epidemiological Study Revealing Pathogen Transmission by Whole-Genome Sequencing.  
410 *J Clin Microbiol.* 2018;56(9). Epub 2018/06/29. doi: 10.1128/JCM.00302-18. pmid:  
411 29950330.
- 412 19. Frothingham R, Meeker-O'Connell WA. Genetic diversity in the *Mycobacterium*  
413 *tuberculosis* complex based on variable numbers of tandem DNA repeats. *Microbiology.*  
414 1998;144 ( Pt 5):1189-96. doi: 10.1099/00221287-144-5-1189. pmid: 9611793.
- 415 20. Skuce RA, McCorry TP, McCarroll JF, Roring SMM, Scott AN, Brittain D, et al.  
416 Discrimination of *Mycobacterium tuberculosis* complex bacteria using novel VNTR-PCR  
417 targets. *Microbiology (Reading).* 2002;148(Pt 2):519-28. Epub 2002/02/08. doi:  
418 10.1099/00221287-148-2-519. pmid: 11832515.
- 419 21. Hunter PR, Gaston MA. Numerical index of the discriminatory ability of typing systems:  
420 an application of Simpson's index of diversity. *J Clin Microbiol.* 1988;26(11):2465-6. Epub  
421 1988/11/01. doi: 10.1128/jcm.26.11.2465-2466.1988. pmid: 3069867.
- 422 22. Damene H, Tahir D, Diels M, Berber A, Sahraoui N, Rigouts L. Broad diversity of  
423 *Mycobacterium tuberculosis* complex strains isolated from humans and cattle in Northern  
424 Algeria suggests a zoonotic transmission cycle. *PLoS Negl Trop Dis.*  
425 2020;14(11):e0008894. Epub 2020/12/01. doi: 10.1371/journal.pntd.0008894. pmid:  
426 33253150.

- 427 23. Sahraoui N, Muller B, Guetarni D, Boulahbal F, Yala D, Ouzrout R, et al. Molecular  
428 characterization of *Mycobacterium bovis* strains isolated from cattle slaughtered at two  
429 abattoirs in Algeria. *BMC Vet Res.* 2009;5:4. Epub 2009/01/29. doi: 10.1186/1746-6148-  
430 5-4. pmid: 19173726.
- 431 24. Yahyaoui-Azami H, Aboukhassib H, Bouslikhane M, Berrada J, Rami S, Reinhard M, et  
432 al. Molecular characterization of bovine tuberculosis strains in two slaughterhouses in  
433 Morocco. *Bmc Veterinary Research.* 2017;13. doi: 10.1186/s12917-017-1165-6. pmid:  
434 WOS:000408325200001.
- 435 25. Djemal SE, Siala M, Smaoui S, Kammoun S, Marouane C, Bezos J, et al. Genetic diversity  
436 assessment of Tunisian *Mycobacterium bovis* population isolated from cattle. *BMC Vet*  
437 *Res.* 2017;13(1):393. Epub 2017/12/17. doi: 10.1186/s12917-017-1314-y. pmid:  
438 29246228.
- 439 26. Hauer A, De Cruz K, Cochard T, Godreuil S, Karoui C, Henault S, et al. Genetic Evolution  
440 of *Mycobacterium bovis* Causing Tuberculosis in Livestock and Wildlife in France since  
441 1978. *Plos One.* 2015;10(2). doi: 10.1371/journal.pone.0117103. pmid:  
442 WOS:000349444900101.
- 443 27. Tazerart F, Saad J, Niar A, Sahraoui N, Drancourt M. *Mycobacterium bovis* Pulmonary  
444 Tuberculosis, Algeria. *Emerg Infect Dis.* 2021;27(3):972-4. Epub 2021/02/25. doi:  
445 10.3201/eid2703.191823. pmid: 33622469.
- 446 28. Ghavidel M, Mansury D, Nourian K, Ghazvini K. The most common spoligotype of  
447 *Mycobacterium bovis* isolated in the world and the recommended loci for VNTR typing; A  
448 systematic review. *Microb Pathog.* 2018;118:310-5. Epub 2018/03/27. doi:  
449 10.1016/j.micpath.2018.03.036. pmid: 29578066.
- 450 29. Haddad N, Masselot M, Durand B. Molecular differentiation of *Mycobacterium bovis*  
451 isolates. Review of main techniques and applications. *Res Vet Sci.* 2004;76(1):1-18. Epub  
452 2003/12/09. doi: 10.1016/s0034-5288(03)00078-x. pmid: 14659724.
- 453 30. Biffa D, Skjerve E, Oloya J, Bogale A, Abebe F, Dahle U, et al. Molecular characterization  
454 of *Mycobacterium bovis* isolates from Ethiopian cattle. *BMC Vet Res.* 2010;6:28. Epub  
455 2010/05/29. doi: 10.1186/1746-6148-6-28. pmid: 20507576.
- 456 31. Lamine-Khemiri H, Martinez R, Garcia-Jimenez WL, Benitez-Medina JM, Cortes M,  
457 Hurtado I, et al. Genotypic characterization by spoligotyping and VNTR typing of  
458 *Mycobacterium bovis* and *Mycobacterium caprae* isolates from cattle of Tunisia. *Trop*  
459 *Anim Health Prod.* 2014;46(2):305-11. Epub 2013/10/26. doi: 10.1007/s11250-013-0488-  
460 y. pmid: 24158359.
- 461 32. Muller B, Steiner B, Bonfoh B, Fane A, Smith NH, Zinsstag J. Molecular characterisation  
462 of *Mycobacterium bovis* isolated from cattle slaughtered at the Bamako abattoir in Mali.  
463 *BMC Vet Res.* 2008;4:26. Epub 2008/07/19. doi: 10.1186/1746-6148-4-26. pmid:  
464 18637160.
- 465 33. Mekonnen GA, Mihret A, Tamiru M, Hailu E, Olani A, Aliy A, et al. Genotype Diversity  
466 of *Mycobacterium bovis* and Pathology of Bovine Tuberculosis in Selected Emerging  
467 Dairy Regions of Ethiopia. *Front Vet Sci.* 2020;7:553940. Epub 2020/11/17. doi:  
468 10.3389/fvets.2020.553940. pmid: 33195524.
- 469 34. de la Fuente J, Diez-Delgado I, Contreras M, Vicente J, Cabezas-Cruz A, Tobes R, et al.  
470 Comparative Genomics of Field Isolates of *Mycobacterium bovis* and *M. caprae* Provides

- 471 Evidence for Possible Correlates with Bacterial Viability and Virulence. PLoS Negl Trop  
472 Dis. 2015;9(11):e0004232. doi: 10.1371/journal.pntd.0004232. pmid: 26583774.
- 473 35. Matos F, Amado A, Botelho A. Molecular typing of *Mycobacterium bovis* isolated in the  
474 first outbreak of bovine tuberculosis in the Azores Islands: a case report. Vet Med (Praha).  
475 2010;55(3):133-6. doi: 10.17221/137/2009-Vetmed. pmid: WOS:000276716000006.
- 476 36. Boniotti MB, Gorla M, Loda D, Garrone A, Benedetto A, Mondo A, et al. Molecular typing  
477 of *Mycobacterium bovis* strains isolated in Italy from 2000 to 2006 and evaluation of  
478 variable-number tandem repeats for geographically optimized genotyping. J Clin  
479 Microbiol. 2009;47(3):636-44. Epub 2009/01/16. doi: 10.1128/JCM.01192-08. pmid:  
480 19144792.
- 481 37. Boschioli ML, Michelet L, Hauer A, de Cruz K, Courcoule A, Hénault S, et al. Tuberculose  
482 bovine en France : cartographie des souches de *Mycobacterium bovis* entre 2000-2013.  
483 Bulletin épidémiologique, santé animale et alimentation. 2015;70:2-8.
- 484 38. Matos F, Cunha MV, Canto A, Albuquerque T, Amado A, Botelho A. Snapshot of  
485 *Mycobacterium bovis* and *Mycobacterium caprae* infections in livestock in an area with a  
486 low incidence of bovine tuberculosis. J Clin Microbiol. 2010;48(11):4337-9. Epub  
487 2010/09/17. doi: 10.1128/JCM.01762-10. pmid: 20844227.
- 488 39. Prodinger WM, Brandstatter A, Naumann L, Pacciarini M, Kubica T, Boschioli ML, et al.  
489 Characterization of *Mycobacterium caprae* isolates from Europe by mycobacterial  
490 interspersed repetitive unit genotyping. J Clin Microbiol. 2005;43(10):4984-92. doi:  
491 10.1128/JCM.43.10.4984-4992.2005. pmid: 16207952.
- 492 40. Rodriguez S, Bezos J, Romero B, de Juan L, Alvarez J, Castellanos E, et al. *Mycobacterium*  
493 *caprae* infection in livestock and wildlife, Spain. Emerg Infect Dis. 2011;17(3):532-5. doi:  
494 10.3201/eid1703.100618. pmid: 21392452.
- 495 41. Siala M, Cassan C, Smaoui S, Kammoun S, Marouane C, Godreuil S, et al. A first insight  
496 into genetic diversity of *Mycobacterium bovis* isolated from extrapulmonary tuberculosis  
497 patients in South Tunisia assessed by spoligotyping and MIRU VNTR. PLoS Negl Trop  
498 Dis. 2019;13(9):e0007707. Epub 2019/09/19. doi: 10.1371/journal.pntd.0007707. pmid:  
499 31532767.
- 500 42. Sahraoui N, Muller B, Djamel Y, Fadela B, Rachid O, Jakob Z, et al. Evaluation des VNTR  
501 (variable number of tandem repeats) des isolats de *Mycobacterium bovis* en Algérie. Ann  
502 Biol Clin (Paris). 2010;68(4):449-53. Epub 2010/07/24. doi: 10.1684/abc.2010.0459. pmid:  
503 20650740.
- 504 43. Bolado-Martinez E, Benavides-Davila I, Candia-Plata Mdel C, Navarro-Navarro M,  
505 Aviles-Acosta M, Alvarez-Hernandez G. Proposal of a Screening MIRU-VNTR Panel for  
506 the Preliminary Genotyping of *Mycobacterium bovis* in Mexico. Biomed Res Int.  
507 2015;2015:416479. Epub 2015/05/07. doi: 10.1155/2015/416479. pmid: 25945333.
- 508 44. Kohl TA, Kranzer K, Andres S, Wirth T, Niemann S, Moser I. Population structure of  
509 *Mycobacterium bovis* in Germany: A long-term study using Whole Genome Sequencing  
510 combined with conventional molecular typing methods. J Clin Microbiol. 2020. Epub  
511 2020/08/21. doi: 10.1128/JCM.01573-20. pmid: 32817084.
- 512 45. Rodriguez-Campos S, Navarro Y, Romero B, de Juan L, Bezos J, Mateos A, et al. Splitting  
513 of a prevalent *Mycobacterium bovis* spoligotype by variable-number tandem-repeat typing  
514 reveals high heterogeneity in an evolving clonal group. J Clin Microbiol.  
515 2013;51(11):3658-65. Epub 2013/08/30. doi: 10.1128/JCM.01271-13. pmid: 23985914.

- 516 46. Yang L, Wang C, Wang H, Meng Q, Wang Q. Evaluation of MIRU-VNTR for typing of  
517 *Mycobacterium bovis* isolated from Sika deer in Northeast China. *BMC Vet Res.*  
518 2015;11:93. Epub 2015/04/19. doi: 10.1186/s12917-015-0402-0. pmid: 25889075.
- 519 47. Bouklata N, Supply P, Jaouhari S, Charof R, Seghrouchni F, Sadki K, et al. Molecular  
520 Typing of *Mycobacterium Tuberculosis* Complex by 24-Locus Based MIRU-VNTR  
521 Typing in Conjunction with Spoligotyping to Assess Genetic Diversity of Strains  
522 Circulating in Morocco. *PLoS One.* 2015;10(8):e0135695. Epub 2015/08/19. doi:  
523 10.1371/journal.pone.0135695. pmid: 26285026.
- 524 48. Cowie CE, Hutchings MR, Barasona JA, Gortázar C, Vicente J, White PCL. Interactions  
525 between four species in a complex wildlife: livestock disease community: implications for  
526 *Mycobacterium bovis* maintenance and transmission. *Eur J Wildlife Res.* 2015;62(1):51-  
527 64. doi: 10.1007/s10344-015-0973-x.
- 528 49. Katala BZ, Mbugi EV, Siame KK, Keyyu JD, Kendall S, Kazwala RR, et al. Isolation and  
529 Potential for Transmission of *Mycobacterium bovis* at Human-livestock-wildlife Interface  
530 of the Serengeti Ecosystem, Northern Tanzania. *Transbound Emerg Dis.* 2017;64(3):815-  
531 25. Epub 2015/11/14. doi: 10.1111/tbed.12445. pmid: 26563417.
- 532 50. Aranaz A, De Juan L, Montero N, Sanchez C, Galka M, Delso C, et al. Bovine tuberculosis  
533 (*Mycobacterium bovis*) in wildlife in Spain. *J Clin Microbiol.* 2004;42(6):2602-8. Epub  
534 2004/06/09. doi: 10.1128/JCM.42.6.2602-2608.2004. pmid: 15184440.
- 535 51. El Mrini M, Kichou F, Kadiri A, Berrada J, Bouslikhane M, Cordonnier N, et al. Animal  
536 tuberculosis due to *Mycobacterium bovis* in Eurasian wild boar from Morocco. *Eur J*  
537 *Wildlife Res.* 2016;62(4):479-82. doi: 10.1007/s10344-016-1022-0.
- 538 52. Loiseau C, Menardo F, Aseffa A, Hailu E, Gumi B, Ameni G, et al. An African origin for  
539 *Mycobacterium bovis*. *Evol Med Public Health.* 2020;2020(1):49-59. Epub 2020/03/27.  
540 doi: 10.1093/emph/eoaa005. pmid: 32211193.
- 541 53. Smith NH. The global distribution and phylogeography of *Mycobacterium bovis* clonal  
542 complexes. *Infection Genetics and Evolution.* 2012;12(4):857-65. doi:  
543 10.1016/j.meegid.2011.09.007. pmid: WOS:000304219200035.
- 544 54. Rodriguez-Campos S, Smith NH, Boniotti MB, Aranaz A. Overview and phylogeny of  
545 *Mycobacterium tuberculosis* complex organisms: Implications for diagnostics and  
546 legislation of bovine tuberculosis. *Res Vet Sci.* 2014;97:S5-S19. doi:  
547 10.1016/j.rvsc.2014.02.009. pmid: WOS:000345809400002.
- 548 55. Comas I, Homolka S, Niemann S, Gagneux S. Genotyping of genetically monomorphic  
549 bacteria: DNA sequencing in *Mycobacterium tuberculosis* highlights the limitations of  
550 current methodologies. *PLoS One.* 2009;4(11):e7815. Epub 2009/11/17. doi:  
551 10.1371/journal.pone.0007815. pmid: 19915672.
- 552 56. Malama S, Johansen TB, Muma JB, Munyeme M, Mbulo G, Muwonge A, et al.  
553 Characterization of *Mycobacterium bovis* from Humans and Cattle in Namwala District,  
554 Zambia. *Vet Med Int.* 2014;2014:187842. Epub 2014/05/23. doi: 10.1155/2014/187842.  
555 pmid: 24847441.
- 556 57. Machado A, Rito T, Ghebremichael S, Muhate N, Maxhuza G, Macuamule C, et al. Genetic  
557 diversity and potential routes of transmission of *Mycobacterium bovis* in Mozambique.  
558 *PLoS Negl Trop Dis.* 2018;12(1):e0006147. Epub 2018/01/19. doi:  
559 10.1371/journal.pntd.0006147. pmid: 29346413.

560 58. Brites D, Loiseau C, Menardo F, Borrell S, Boniotti MB, Warren R, et al. A New  
561 Phylogenetic Framework for the Animal-Adapted Mycobacterium tuberculosis Complex.  
562 Frontiers in microbiology. 2018;9:2820. Epub 2018/12/13. doi:  
563 10.3389/fmicb.2018.02820. pmid: 30538680.

564
